# Supplementary material
Source: PubMed Central journal article supplement (PMC1183566)

# Human HD Gene Region

## HD gene

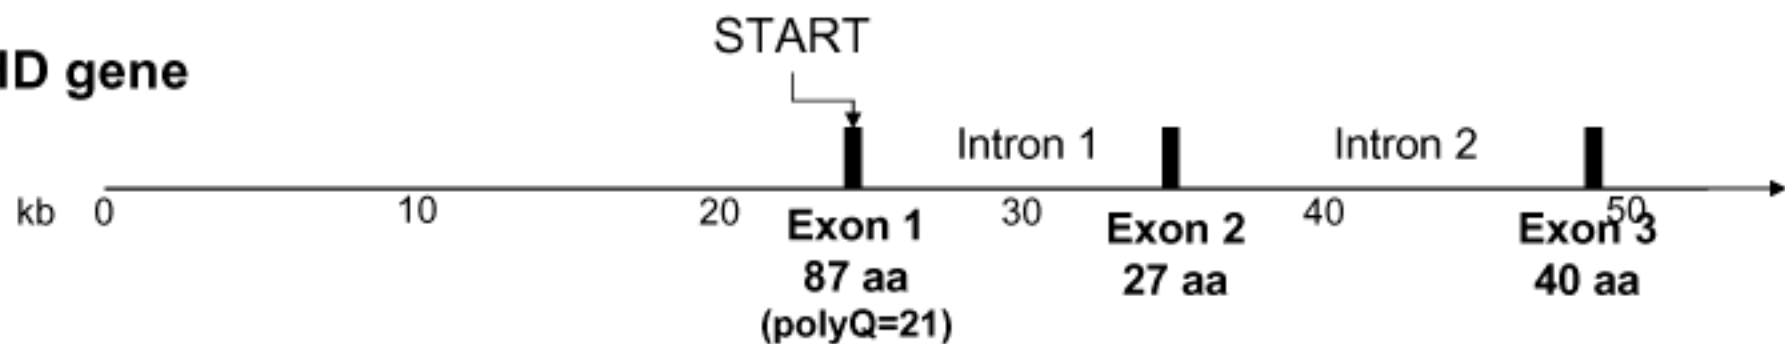

## SHORTSTOP

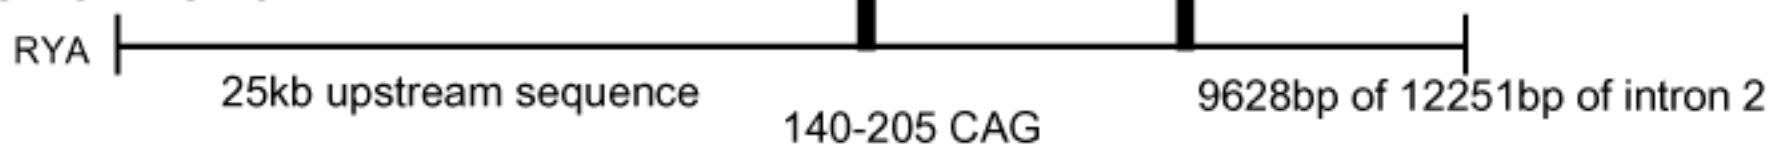

## R6/2

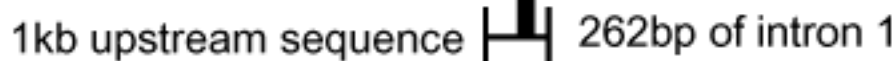

## N171

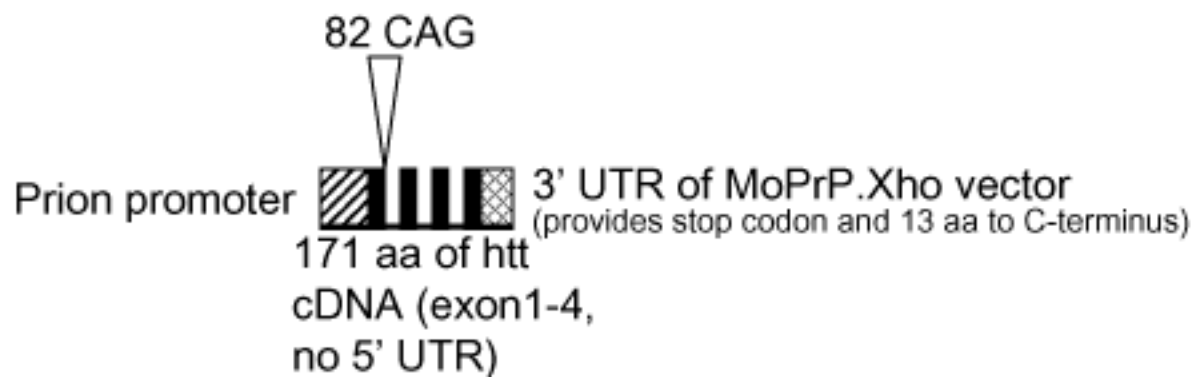

Supplement: pnas_0503634102_1.pdf [file pnas_0503634102_1.pdf]
